# Supplementary material
Source: Springer Nature journal article supplement (https://www.springermedizin.de/resource/supplementary/12933_2009_219_MOESM3_ESM.pdf/9539878)

**A**

ESR  $\text{Fe}^{2+}(\text{DETTC})_2\text{-NO}^\bullet$   
(4dB, 900G, 1<sup>st</sup> peak to 3<sup>rd</sup> valley)

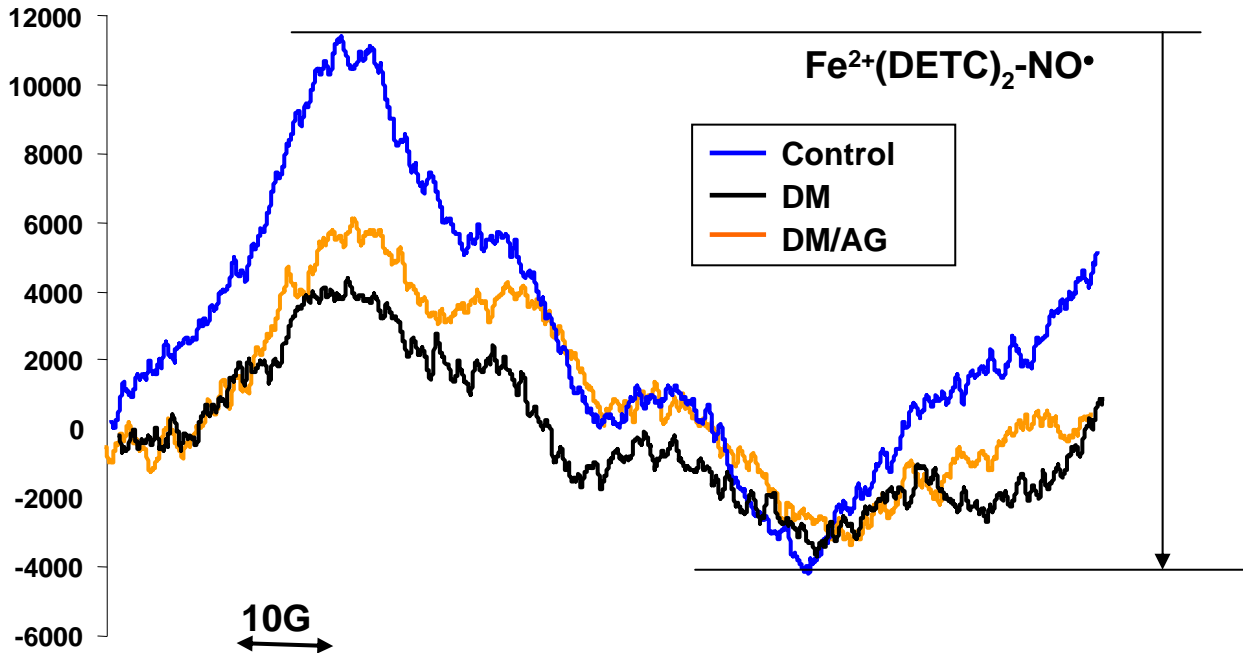**B**

Aortic Nitric Oxide Production  
(nmol/mg aorta)

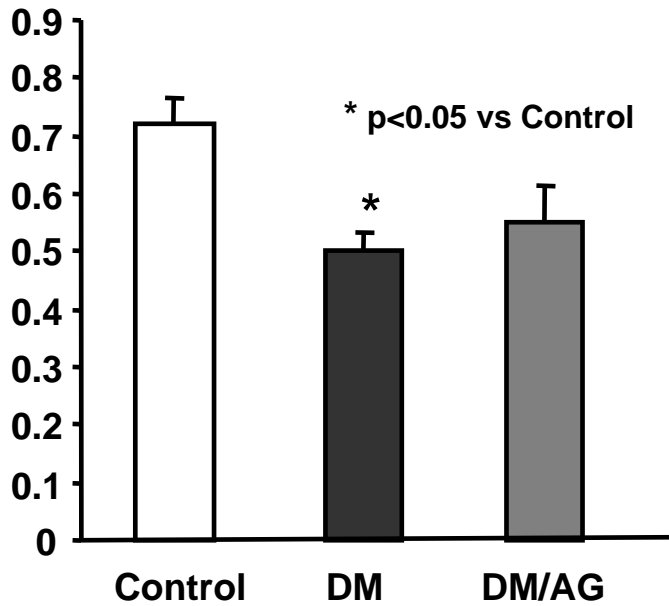

Supplement: MOESM3 [file 9539878]
